# Supplementary material for: Extraction, separation and characterization of endotoxins in water samples using solid phase extraction and capillary electrophoresis-laser induced fluorescence
Source: PubMed Central journal article supplement (PMC5589922; doi:10.1038/s41598-017-11232-x), 2017-09-07
Supplement: 41598_2017_11232_MOESM1_ESM.pdf [file 41598_2017_11232_MOESM1_ESM.pdf]

# Supporting Information

**Title:** Extraction, separation and characterization of endotoxins in water samples using solid phase extraction and capillary electrophoresis-laser induced fluorescence

**Fun Man Fung<sup>1,2</sup>, Min Su<sup>1</sup>, Hua-tao Feng<sup>1,3\*</sup>, Sam Fong Yau Li<sup>1,3\*</sup>**

<sup>1</sup> Department of Chemistry, National University of Singapore, 3 Science Drive 3, Singapore, 117543, Singapore

<sup>2</sup> Institute for Application of Learning Science and Educational Technology (ALSET), University Hall, Lee Kong Chian Wing UHL #05-01D, 21 Lower Kent Ridge Road, Singapore, 119077, Singapore

<sup>3</sup> NUS Environmental Research Institute, National University of Singapore, T-Lab Building, 5A Engineering Drive 1, Singapore, 117411, Singapore

**\* Corresponding Author:**

Email: chmlifys@nus.edu.sg. Tel: (65)-6516-2681. Fax: (65)-6779-1691.

Email: chmfeng@nus.edu.sg. Tel: (65)-6516-1953. Fax: (65)-6779-1691.

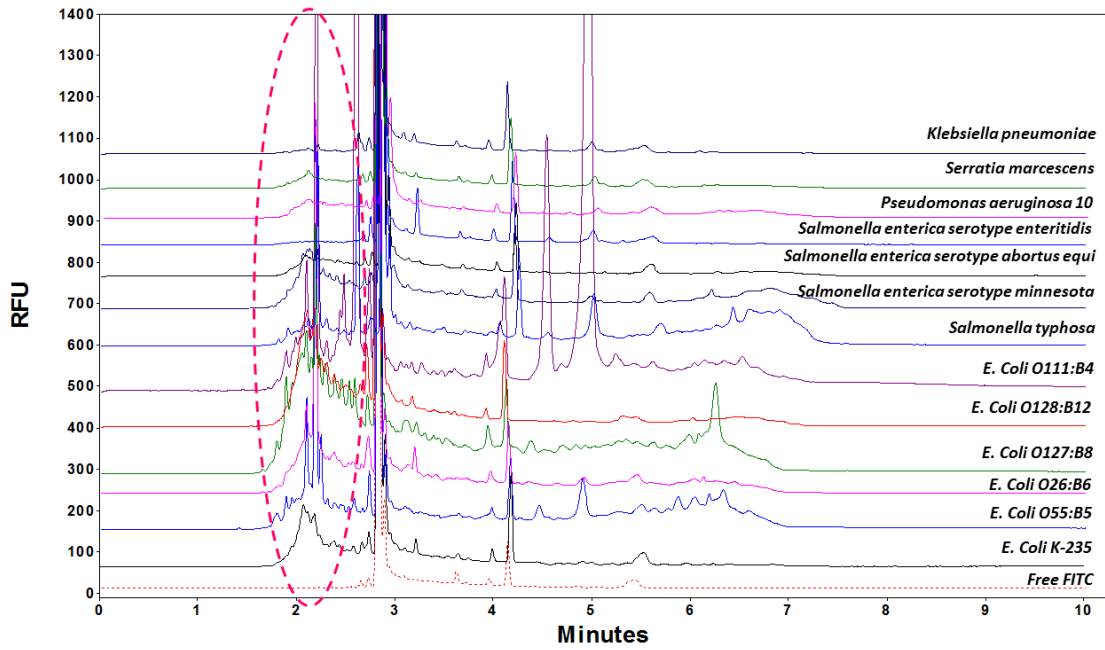

**Fig. S1** LPS separation in 40 mM  $\text{Na}_2\text{B}_4\text{O}_7$  buffer and 40 mM SDS, pH 9.30; Bare fused silica capillary, (I.D. 50  $\mu\text{m}$ ); Total length: 50 cm; Voltage: 30 kV; Sample storage: 25  $^\circ\text{C}$ ; Sample injection time: 5 s.

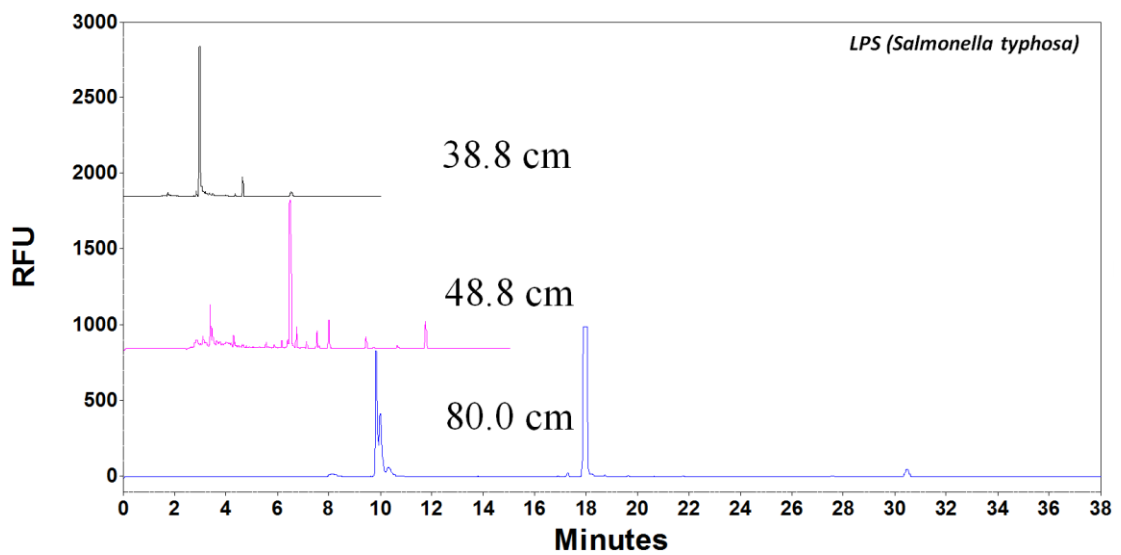

**Fig. S2** LPS separation in 50 mM  $\text{Na}_2\text{B}_4\text{O}_7$  buffer with different capillary lengths. Other conditions: Separation buffer:  $\text{Na}_2\text{B}_4\text{O}_7$  (50 mM), pH 9.30; Bare fused silica capillary, (I.D. 50  $\mu\text{m}$ ); Total length: 39 cm; Voltage: 30 kV; Sample storage: 25  $^\circ\text{C}$ ; Sample injection time: 5 s.

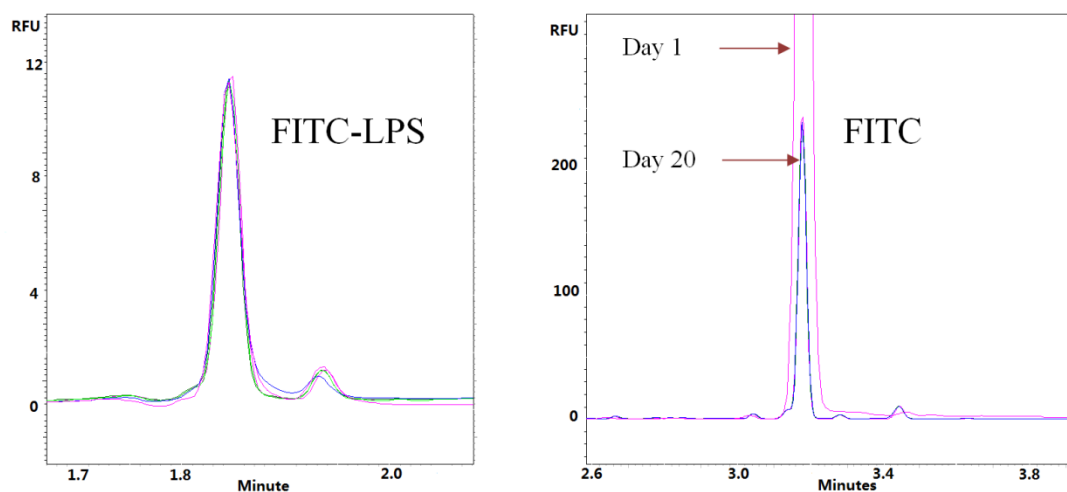

**Fig. S3** Stability study of LPS-FITC from Day 1 to Day 20. Other conditions: Separating in buffer:  $\text{Na}_2\text{B}_4\text{O}_7$  (50 mM), pH 9.30; Bare fused silica capillary, (I.D. 50  $\mu\text{m}$ ); Total length: 39 cm; Voltage: 30 kV; Sample storage: 25  $^\circ\text{C}$ ; Sample injection time: 5 s.

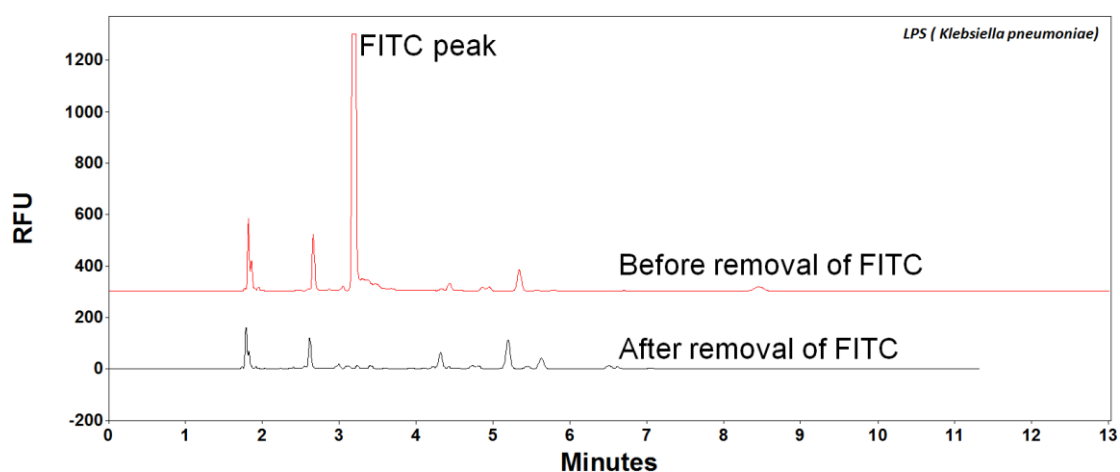

**Fig. S4** (1-3)- $\beta$ -D-glucans interference test. (1) FITC-beta-glucan; (2) FITC control. Other conditions: Separating in buffer:  $\text{Na}_2\text{B}_4\text{O}_7$ (50 mM), pH 9.30; Bare fused silica capillary, (I.D. 50  $\mu\text{m}$ ); Total length: 39 cm; Voltage: 30 kV; Sample storage: 25  $^\circ\text{C}$  ; Sample injection time: 5 s.

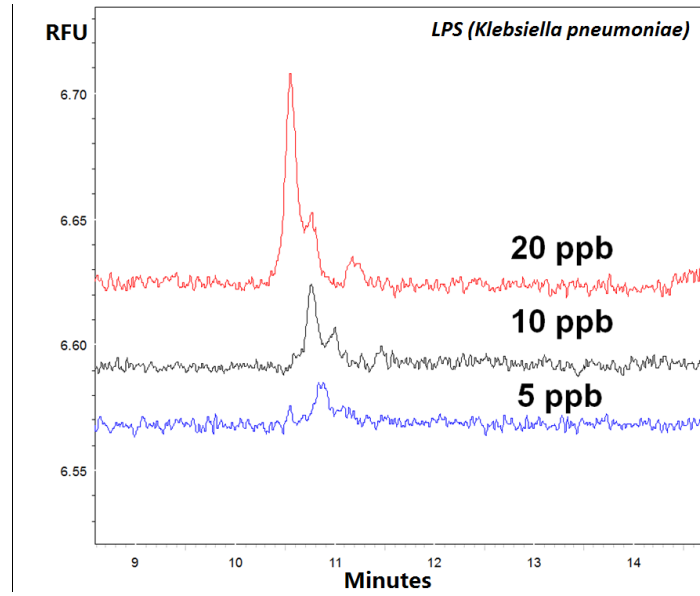

**Fig. S5** Investigation of detection limit of endotoxin from *Klebsiella Pneumonia* by ultrapure water dilution. Other conditions: Separating in buffer:  $\text{Na}_2\text{B}_4\text{O}_7$  (50 mM), pH 9.30; Bare fused silica capillary, (I.D. 100  $\mu\text{m}$ ); Total length: 60 cm; Voltage: 15 kV; Sample injection time: 10 s.
